# Supplementary material for: The characterization of key physiological traits of medicinal cannabis (Cannabis sativa L.) as a tool for precision breeding
Source: BMC Plant Biol. 2021 Jun 26;21:294. doi: 10.1186/s12870-021-03079-2 (PMC8235858; doi:10.1186/s12870-021-03079-2)
Supplement: Supplementary file 1 — Additional file 1: Table S1 Correlation coefficient and P-values demonstrating the association between physiological traits. [file 12870_2021_3079_MOESM1_ESM.xlsx]

## Sheet: Correlations
Additional File 1: Table S1. Correlation coefficient and P-values demonstrating the association between physiological traits
		BDW	DTM	SD	PH	HI	IC	GR-V	GR-R	SDGR-V	SDGR-R	TW	VDW	IL
BDW	Pearson Correlation		-0.118123	.398**	.585**	.587**	.273**	.415**	.286**	.310**	.428**	.615**	.690**	.202*		Abbreviations:
	Sig. (2-tailed)		0.196916	6.20369e-06	1.79011e-12	1.42412e-12	0.00243543	2.23452e-06	0.0014907	0.000529756	1.00545e-06	5.88109e-14	2.18151e-18	0.0261251		BDW	Bud dry weight
	N		121	121	121	121	121	121	121	121	121	121	121	121		DTM	Days to maturation
DTM	Pearson Correlation	-0.118123		-.268**	-.471**	.264**	-0.0868482	-.237**	-.232*	-.214*	-0.157343	-.285**	-.366**	-.330**		SD	Final measurement of stem diameter
	Sig. (2-tailed)	0.196916		0.00297479	4.83641e-08	0.00338478	0.343534	0.00872192	0.0103046	0.0186363	0.0847866	0.00155314	3.61729e-05	0.000223623		PH	Plant height in harvest day
	N	121		121	121	121	121	121	121	121	121	121	121	121		HI	Harvest index
SD	Pearson Correlation	.398**	-.268**		.448**	-.210*	.352**	0.159911	.205*	.842**	.452**	.611**	.723**	-0.0032026		IC	internodes count on the leading shoot
	Sig. (2-tailed)	6.20369e-06	0.00297479		2.58292e-07	0.0209775	7.48908e-05	0.0797634	0.0244305	1.20718e-33	2.01273e-07	1.04131e-13	8.10663e-21	0.972189		GR-V	Height growth rate during the vegetative stage
	N	121	121		121	121	121	121	121	121	121	121	121	121		GR-R	Height growth rate during the reproductive stage
PH	Pearson Correlation	.585**	-.471**	.448**		-0.00129778	.471**	.412**	.638**	.278**	.462**	.707**	.778**	.334**		SDGR-V	Stem diameter growth rate during the vegetative stage
	Sig. (2-tailed)	1.79011e-12	4.83641e-08	2.58292e-07		0.988728	4.93461e-08	2.60761e-06	3.58859e-15	0.00201228	9.35817e-08	1.38292e-19	8.51679e-26	0.000180829		SDGR-R	Stem diameter growth rate during the reproductive stage
	N	121	121	121		121	121	121	121	121	121	121	121	121		TW	Trimmed waste
HI	Pearson Correlation	.587**	.264**	-.210*	-0.00129778		-0.142167	.213*	-0.075252	-0.111141	-0.00730144	-0.0825814	-0.0715406	0.152047		VDW	Vegetative dry weight
	Sig. (2-tailed)	1.42412e-12	0.00338478	0.0209775	0.988728		0.119824	0.0190554	0.41202	0.22489	0.936648	0.367851	0.435521	0.0959428		IL	Average internode length
	N	121	121	121	121		121	121	121	121	121	121	121	121
IC	Pearson Correlation	.273**	-0.0868482	.352**	.471**	-0.142167		-.204*	.530**	0.173817	0.142242	.403**	.366**	-.643**
	Sig. (2-tailed)	0.00243543	0.343534	7.48908e-05	4.93461e-08	0.119824		0.0247096	4.20851e-10	0.056562	0.119625	4.58206e-06	3.71841e-05	1.79452e-15
	N	121	121	121	121	121		121	121	121	121	121	121	121
GR-V	Pearson Correlation	.415**	-.237**	0.159911	.412**	.213*	-.204*		-0.0535249	0.126203	.289**	.263**	.349**	.565**
	Sig. (2-tailed)	2.23452e-06	0.00872192	0.0797634	2.60761e-06	0.0190554	0.0247096		0.559839	0.167787	0.00129707	0.00359561	8.7478e-05	1.4328e-11
	N	121	121	121	121	121	121		121	121	121	121	121	121
GR-R	Pearson Correlation	.286**	-.232*	.205*	.638**	-0.075252	.530**	-0.0535249		0.0566311	.220*	.446**	.428**	-0.0331715
	Sig. (2-tailed)	0.0014907	0.0103046	0.0244305	3.58859e-15	0.41202	4.20851e-10	0.559839		0.537253	0.0154915	2.9962e-07	9.75228e-07	0.717951
	N	121	121	121	121	121	121	121		121	121	121	121	121
SDGR-V	Pearson Correlation	.310**	-.214*	.842**	.278**	-0.111141	0.173817	0.126203	0.0566311		.289**	.466**	.554**	0.0412461
	Sig. (2-tailed)	0.000529756	0.0186363	1.20718e-33	0.00201228	0.22489	0.056562	0.167787	0.537253		0.00128244	7.35108e-08	4.32521e-11	0.653295
	N	121	121	121	121	121	121	121	121		121	121	121	121
SDGR-R	Pearson Correlation	.428**	-0.157343	.452**	.462**	-0.00730144	0.142242	.289**	.220*	.289**		.535**	.535**	.206*
	Sig. (2-tailed)	1.00545e-06	0.0847866	2.01273e-07	9.35817e-08	0.936648	0.119625	0.00129707	0.0154915	0.00128244		2.5788e-10	2.52373e-10	0.0235438
	N	121	121	121	121	121	121	121	121	121		121	121	121
TW	Pearson Correlation	.615**	-.285**	.611**	.707**	-0.0825814	.403**	.263**	.446**	.466**	.535**		.864**	0.140574
	Sig. (2-tailed)	5.88109e-14	0.00155314	1.04131e-13	1.38292e-19	0.367851	4.58206e-06	0.00359561	2.9962e-07	7.35108e-08	2.5788e-10		3.12837e-37	0.124071
	N	121	121	121	121	121	121	121	121	121	121		121	121
VDW	Pearson Correlation	.690**	-.366**	.723**	.778**	-0.0715406	.366**	.349**	.428**	.554**	.535**	.864**		.260**
	Sig. (2-tailed)	2.18151e-18	3.61729e-05	8.10663e-21	8.51679e-26	0.435521	3.71841e-05	8.7478e-05	9.75228e-07	4.32521e-11	2.52373e-10	3.12837e-37		0.00399354
	N	121	121	121	121	121	121	121	121	121	121	121		121
IL	Pearson Correlation	.202*	-.330**	-0.0032026	.334**	0.152047	-.643**	.565**	-0.0331715	0.0412461	.206*	0.140574	.260**
	Sig. (2-tailed)	0.0261251	0.000223623	0.972189	0.000180829	0.0959428	1.79452e-15	1.4328e-11	0.717951	0.653295	0.0235438	0.124071	0.00399354
	N	121	121	121	121	121	121	121	121	121	121	121	121
* Significant at the 0.05 probability level
** significant at the 0.01 probability level
